# Supplementary material for: Therapeutic Potential of Chrysin in Improving Bone Health
Source: MDPI journal article supplement (doi:10.3390/app12178728), 2022-08-31
Supplement: s1 [file s1]

# Therapeutic Potential of Chrysin in Improving Bone Health

Siva Swapna Kasarla <sup>1</sup>, Sujatha Dodoala <sup>1,\*</sup>, Sunitha Sampathi <sup>2</sup>, Narendra Kumar Talluri <sup>3</sup>,  
Vijayabhaskarreddy Junnuthula <sup>4,\*</sup> and Sathish Dyawanapelly <sup>5,\*</sup>

<sup>1</sup> Institute of Pharmaceutical Technology, Sri Padmavati Mahila Viswavidyalayam, Tirupati 517502, India; sivaswapna04@gmail.com

<sup>2</sup> GITAM School of Pharmacy, GITAM Deemed to Be University, Sangareddy, Hyderabad 502329, India; ssampath@gitam.edu

<sup>3</sup> Department of Pharmaceutical Analysis, National Institute of Pharmaceutical Education and Research (NIPER), Balanagar, Hyderabad 500037, India; narendra.talluri@gmail.com

<sup>4</sup> Drug Research Program, Faculty of Pharmacy, University of Helsinki, Viikinkaari 5 E, 00790 Helsinki, Finland

<sup>5</sup> Department of Pharmaceutical Science and Technology, Institute of Chemical Technology, Mumbai 400019, India

\* Correspondence: drsujathasai@spmvv.ac.in (S.D.);  
junnuthula.vijayabhaskarreddy@helsinki.fi (V.J.);  
sa.dyawanapelly@ictmbai.edu.in (S.D.)

## Supplimentary files:

Table S1: The composition of the vitamin D deficient diet as per the reference[1].

| S.No | INGREDIENTS                   | QUANTITY SUFFICIENT FOR 1Kg |
|------|-------------------------------|-----------------------------|
| 1    | Casein                        | 180g                        |
| 2    | L-Cysteine                    | 2.0g                        |
| 3    | Dextrose monohydrate          | 630g                        |
| 4    | Cellulose                     | 30g                         |
| 5    | Mineral mix, Ca – P deficient | 13.37g                      |

---

|    |                                       |         |
|----|---------------------------------------|---------|
| 6  | Calcium Carbonate                     | 25g     |
| 7  | Corn oil                              | 100g    |
| 8  | Potassium Phosphate Dibasic           | 4.9g    |
| 9  | Potassium Phosphate Monobasic         | 3.9g    |
| 10 | Corn starch                           | 1.2214g |
| 11 | Choline Dihydrogen Citrate            | 3.497g  |
| 12 | Vitamin E (500IU/g)                   | 0.242g  |
| 13 | Vitamin A (50000 IU/g)                | 0.0396g |
| 14 | Vitamin mix, without choline, A, D, E | 5g      |
| 15 | Citric acid, Antioxidant              | 0.02g   |

---

- [1] S. M. Mallya *et al.*, "Modeling vitamin D insufficiency and moderate deficiency in adult mice via dietary cholecalciferol restriction," *Endocr. Res.*, vol. 41, no. 4, pp. 290–299, Oct. 2016, doi: 10.3109/07435800.2016.1141937.
